# Supplementary figures and images for: Coupling a Bat Algorithm with XGBoost to Estimate Reference Evapotranspiration in the Arid and Semiarid Regions of China
Source: Hindawi journal article supplement (doi:10.1155/2019/9575782), 2019-10-17

**Figure S1**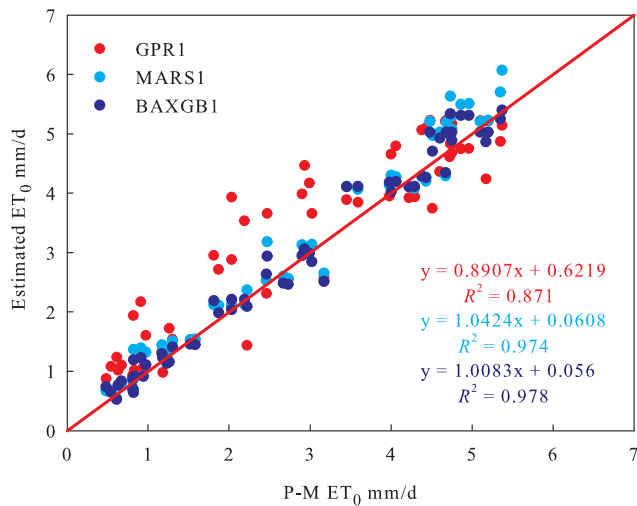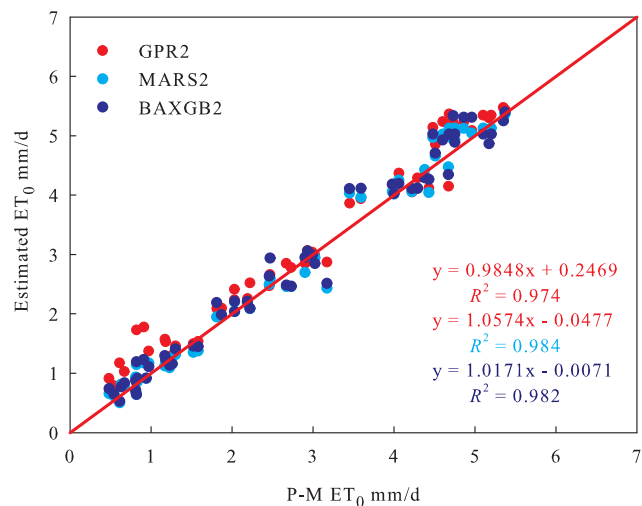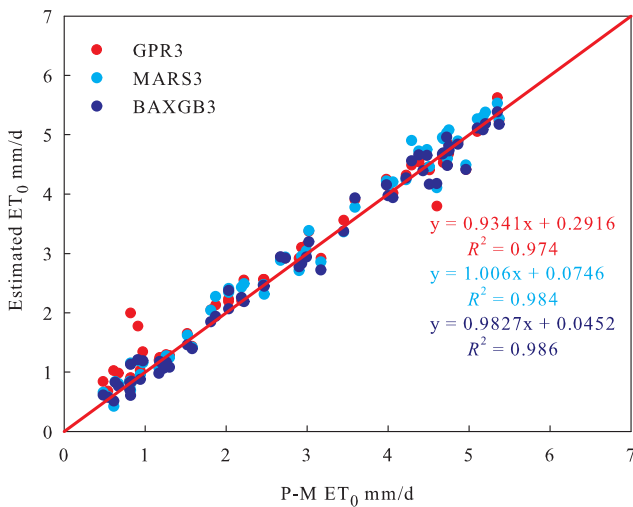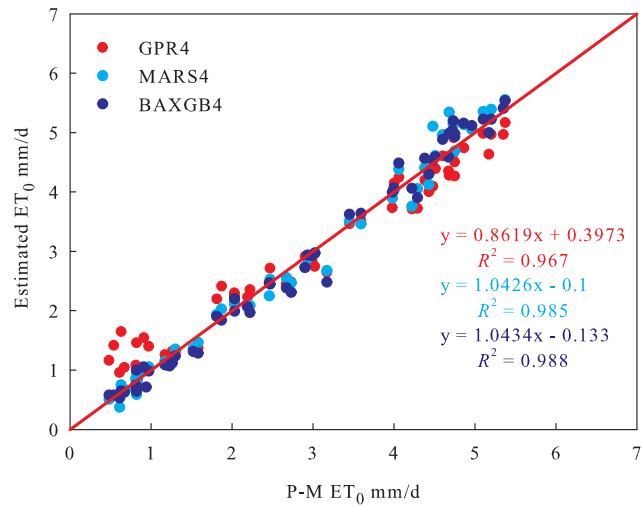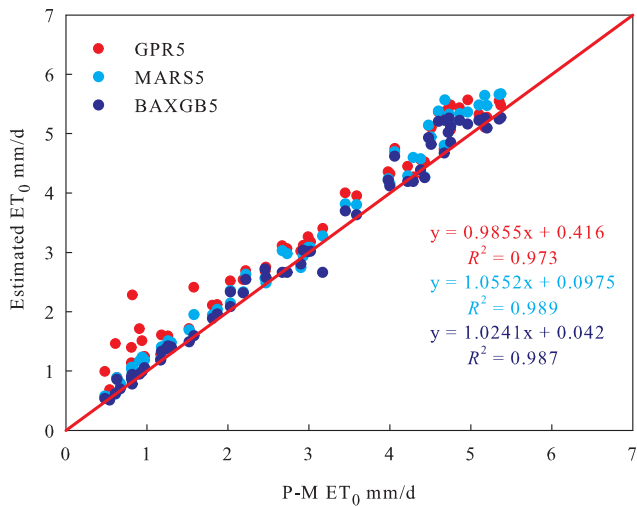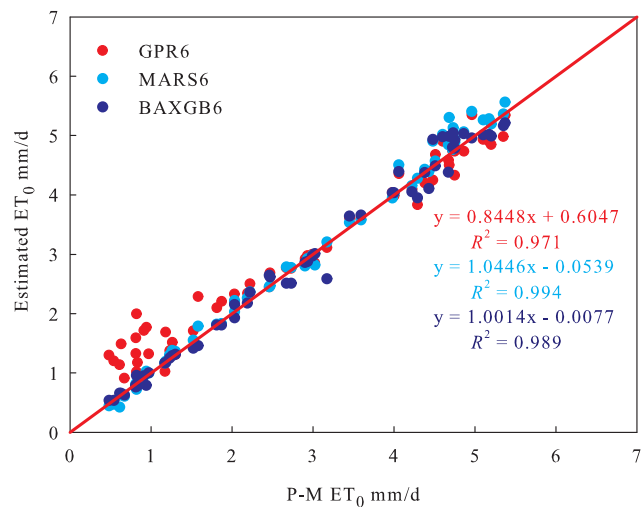

**Figure S2**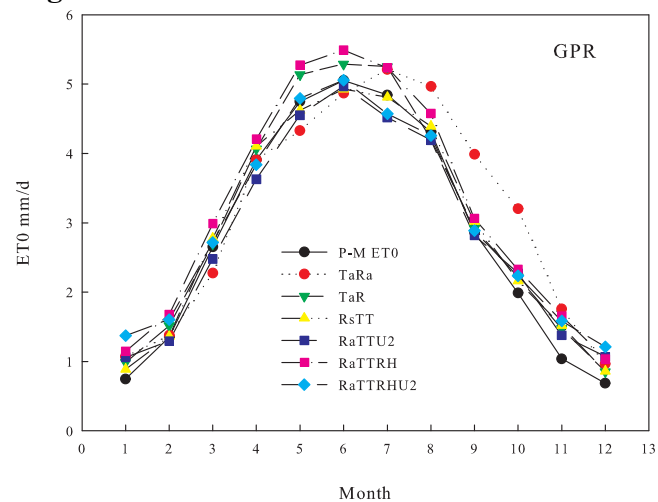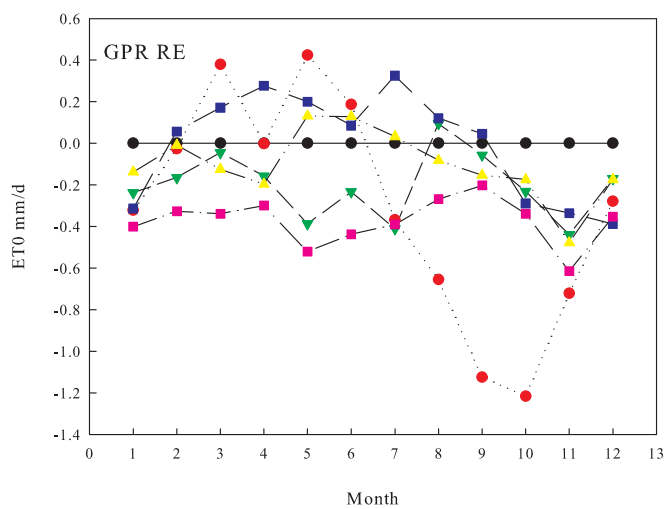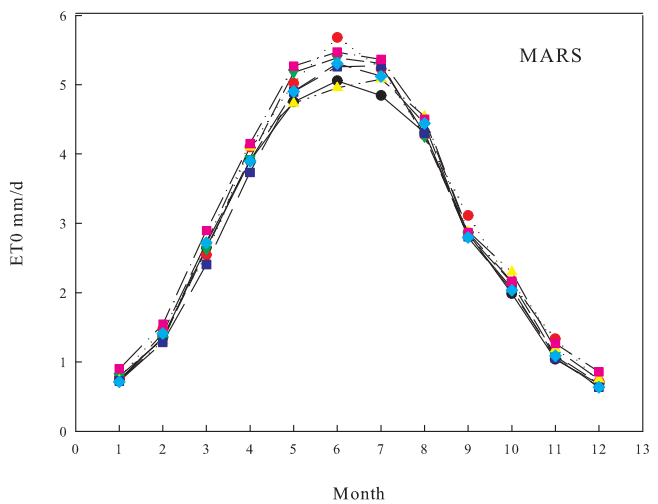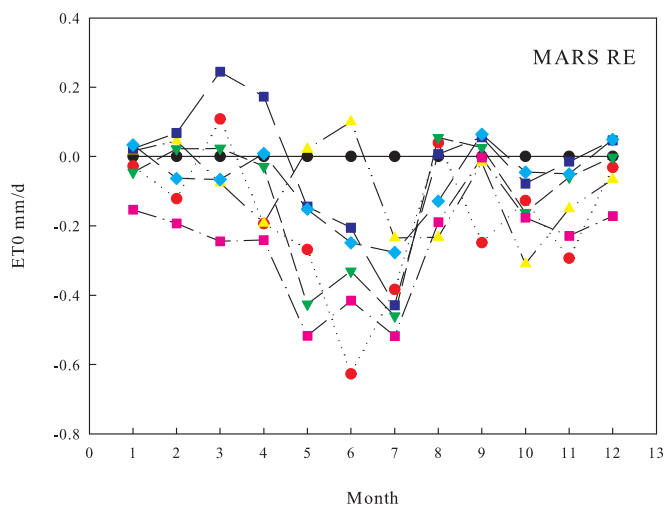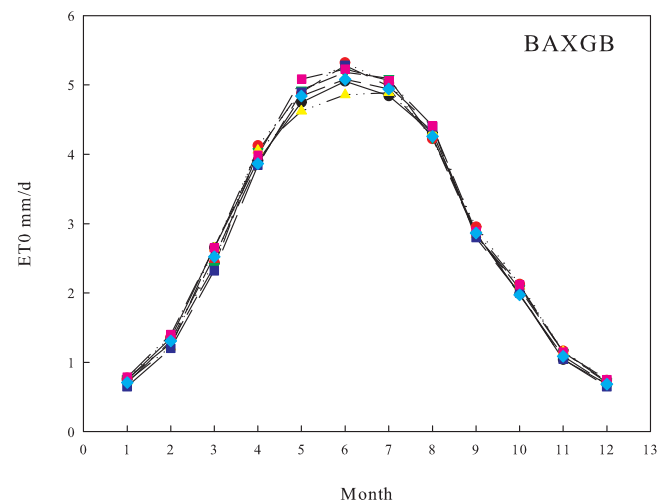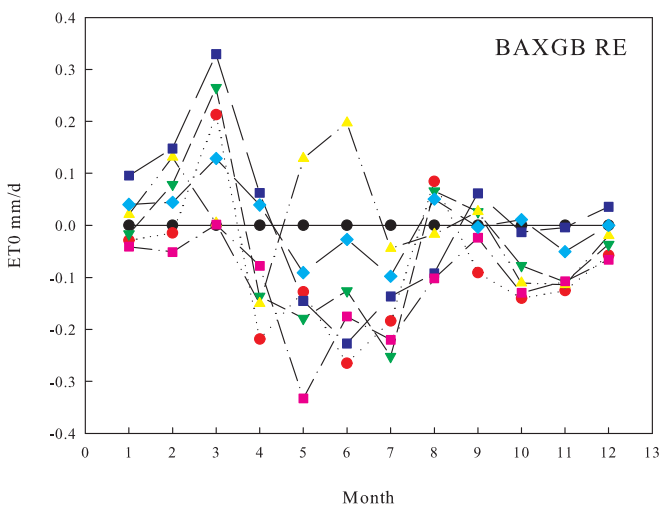

**Figure S3**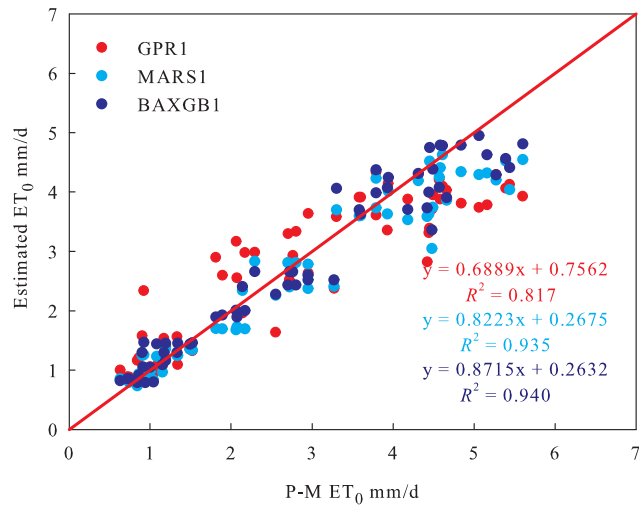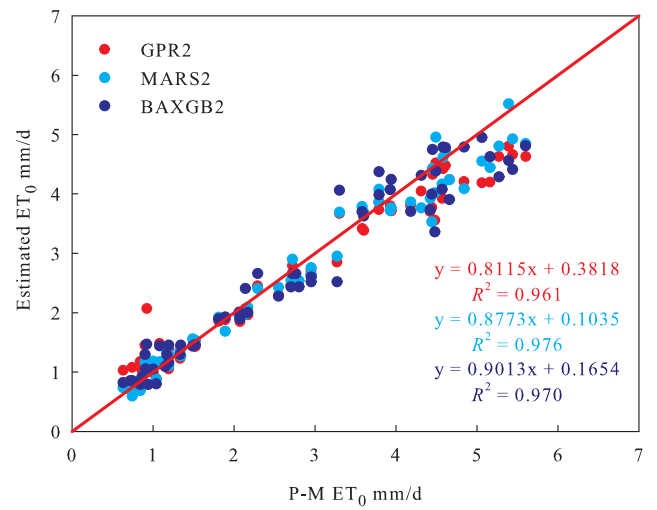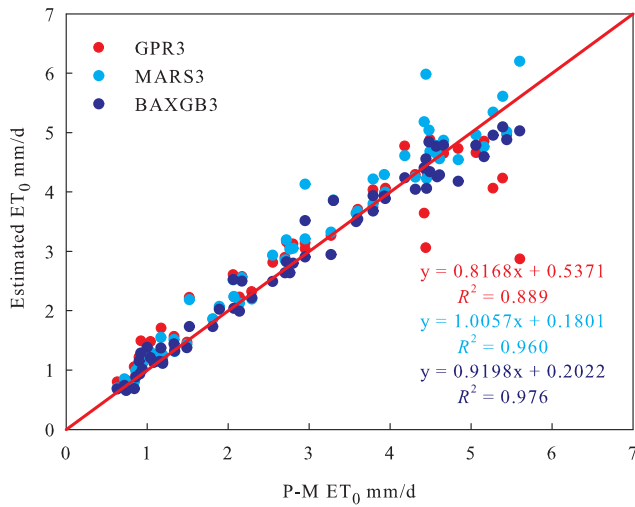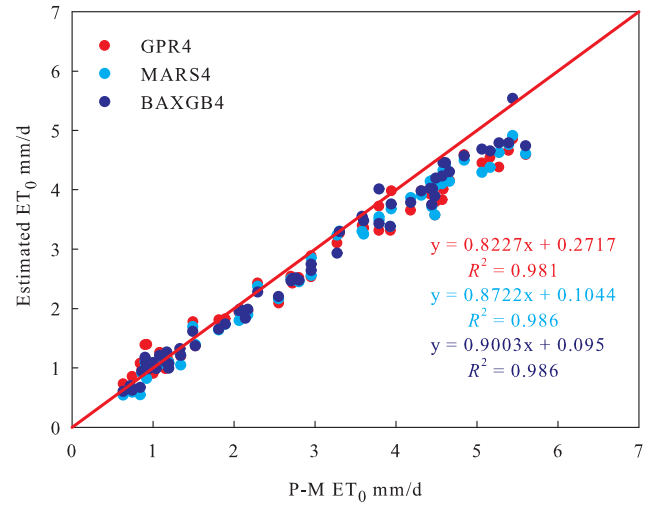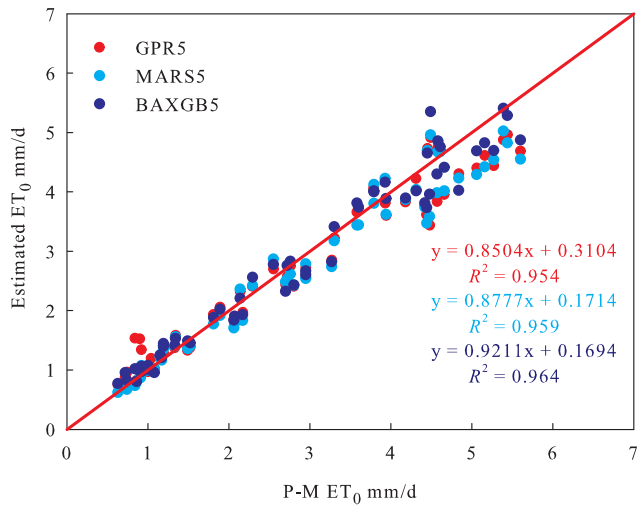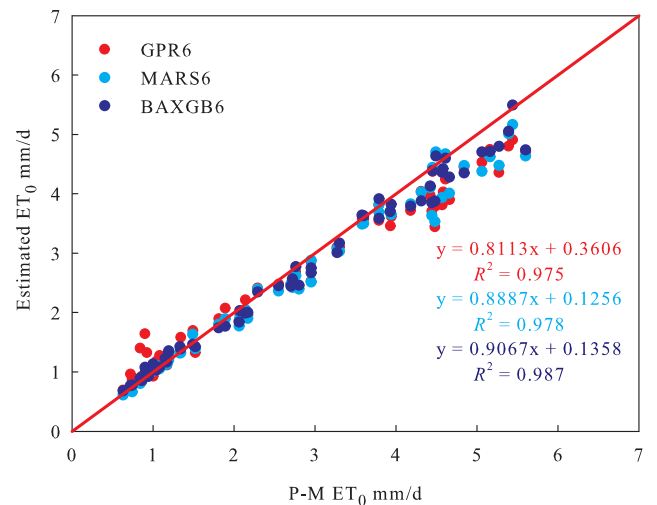

**Figure S4**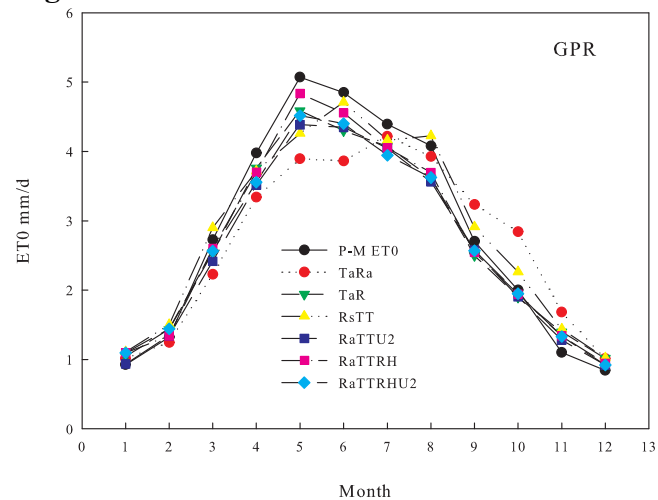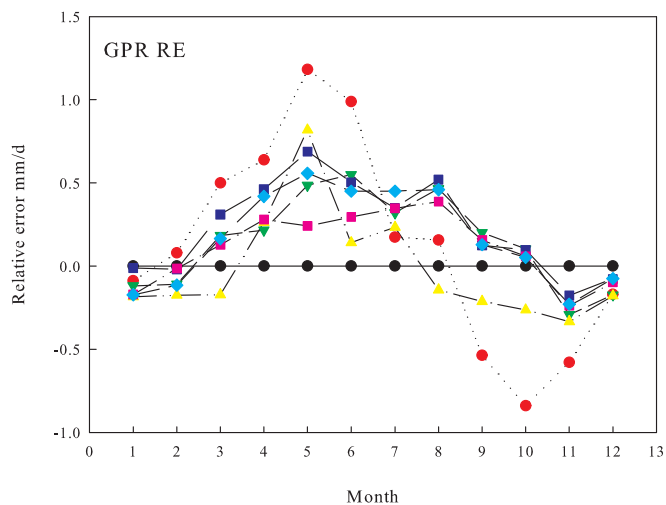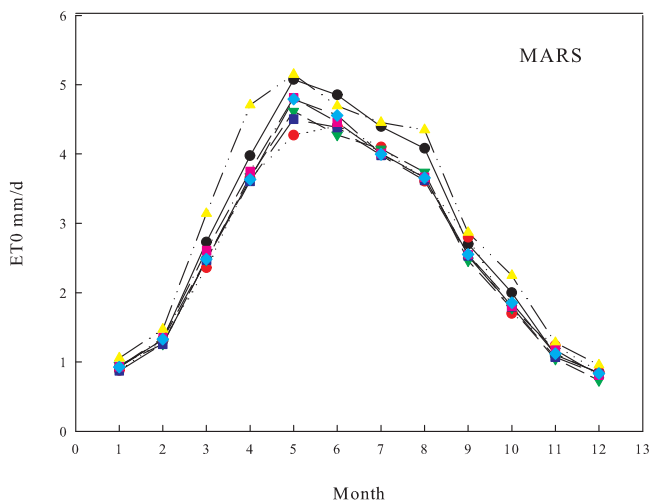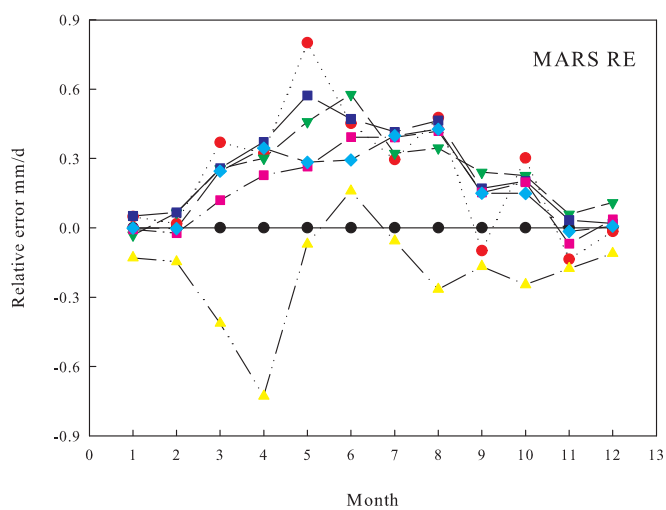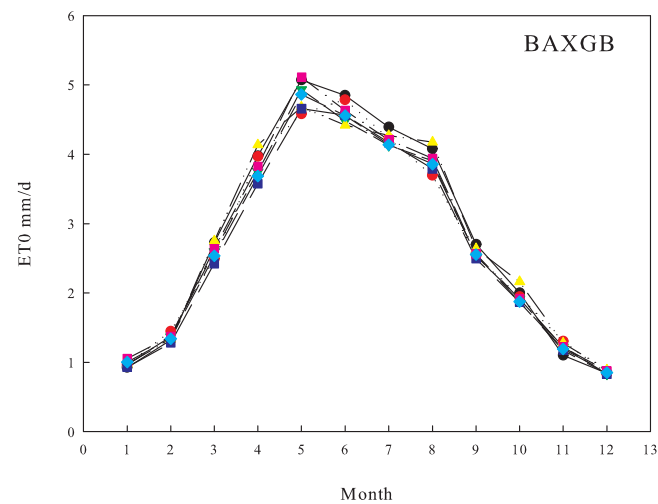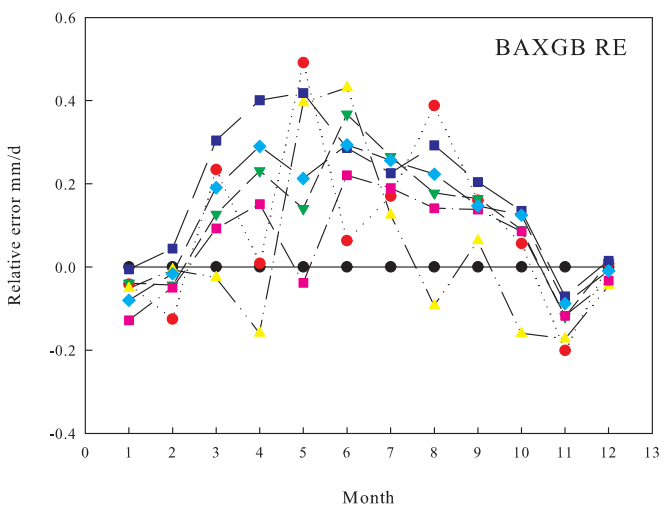

Supplement: f1 [file 9575782.f1.pdf]
